# Supplementary material
Source: PubMed Central journal article supplement (PMC4478195)

Supplemental Figure 1.

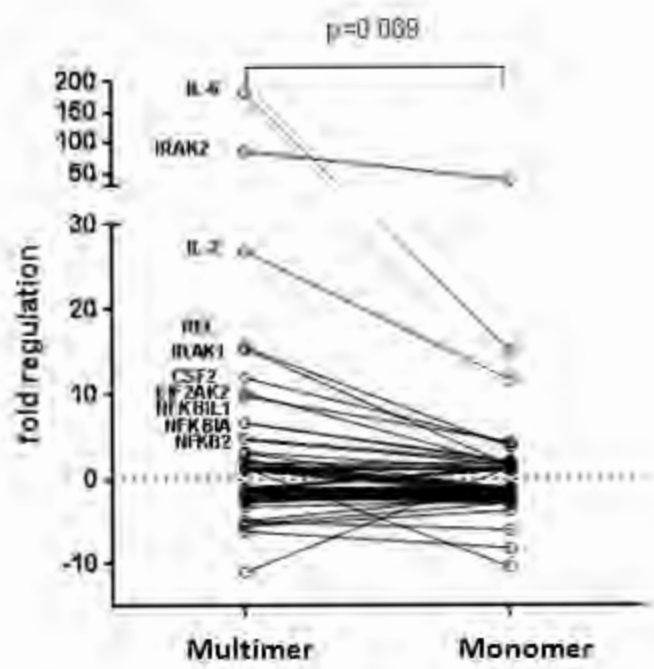

# Supplemental Figure 2.

(-) 1-MT

(+) 1-MT

1:10

1:10

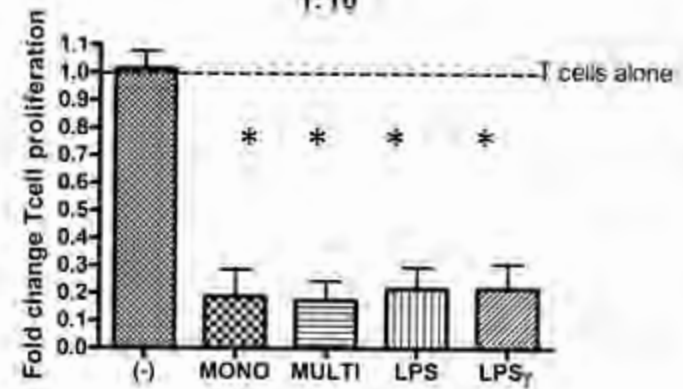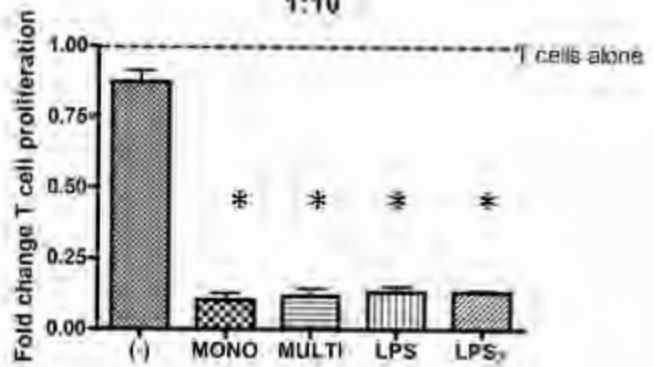

1:30

1:30

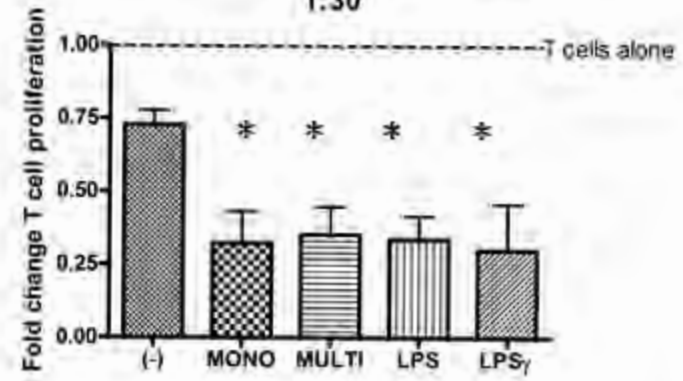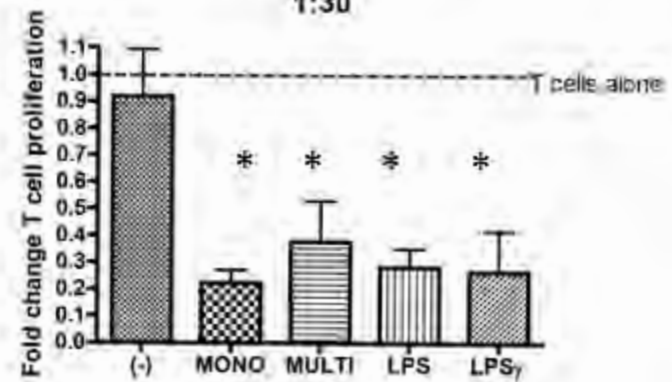

1:300

1:300

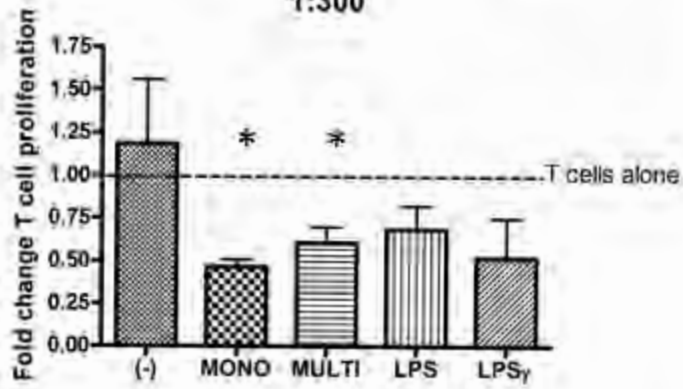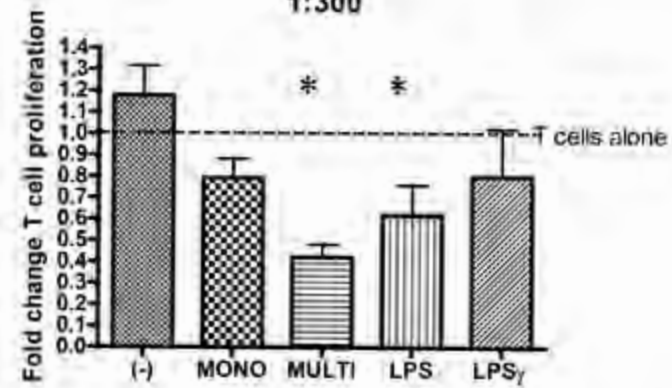

# Supplemental Figure 3.

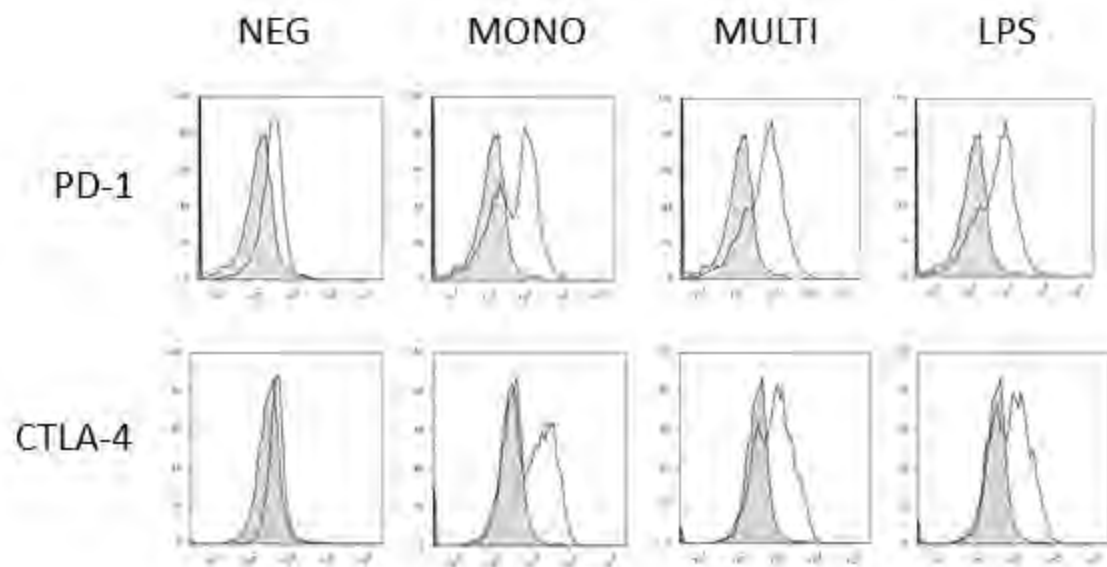

Supplemental Figure 4.

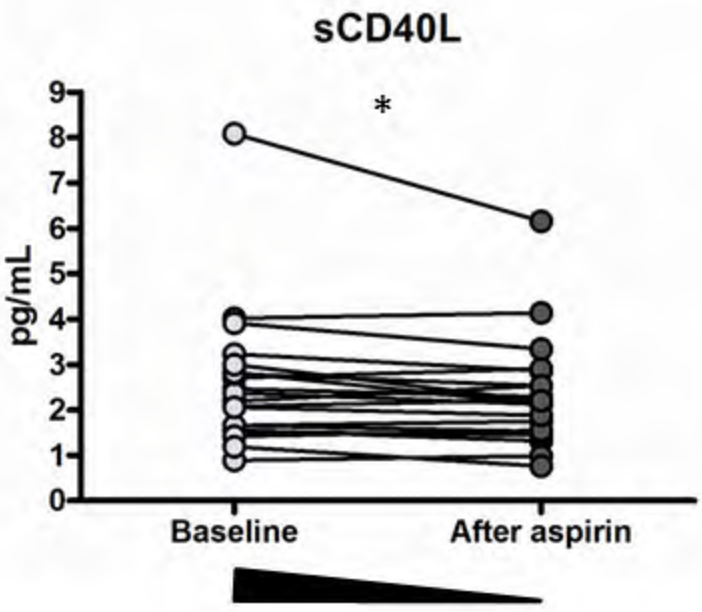

Supplement: NIHMS678224-supplement-01.pdf [file NIHMS678224-supplement-01.pdf]
